# Supplementary material for: Use of normalization methods for analysis of microarrays containing a high degree of gene effects
Source: PubMed Central journal article supplement (PMC2612699; doi:10.1186/1471-2105-9-505), 2008-11-28

**Figure S1. Accuracy of normalization in the analysis of linear simulated data**

Mean relative error in normalization (scaling) factors determined by the seven different normalization methods using D1.25 dataset. Errors that are greater than 50% are not shown. The x-axis corresponds to the total percentage of gene effects (shown as DEG) in a microarray, and up, down, and up/down indicates these effects as up-, down-, and an equal mixture of both, respectively. Median: global median normalization.

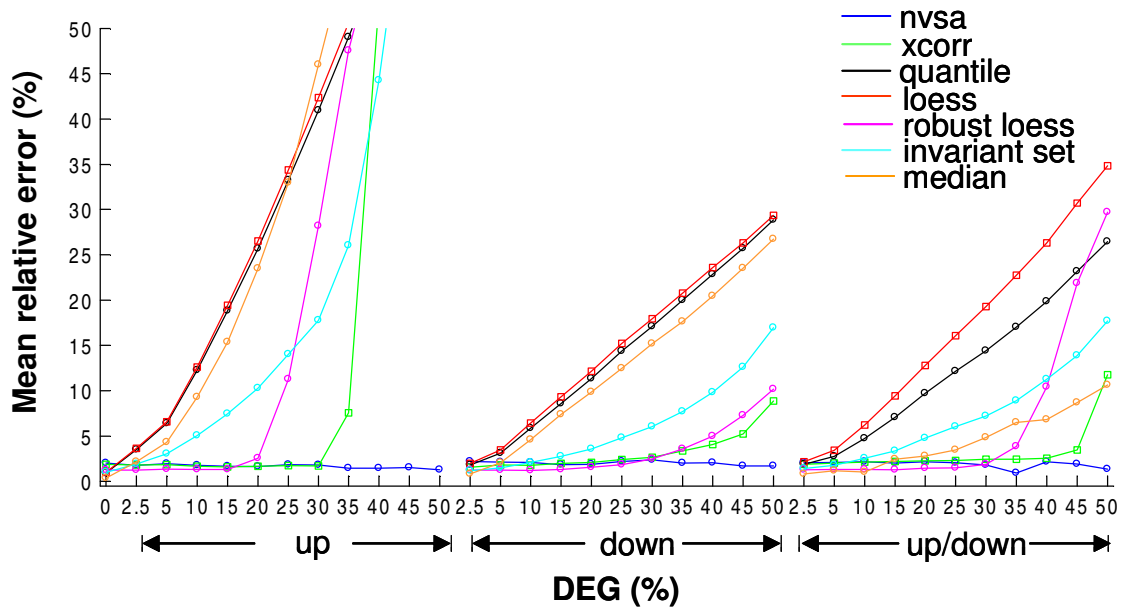

**Figure S2. NVSA normalization before and at the condition of performance break-down**

MA plots of NVSA normalization using Dnl data. Gene effect conditions before (left) and at (right) the performance break-down are shown. Each blue point represents a feature in a microarray. Red and black dots mark the expected values of the 1<sup>st</sup> and 2<sup>nd</sup> largest peaks of LER density distribution for each interval by NVSA method, respectively. Green labels each NVSA-fitted normalization value. Each red circle labels the center interval of the seed invariant in NVSA analysis.

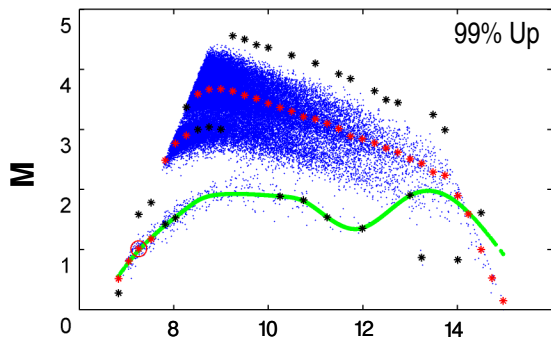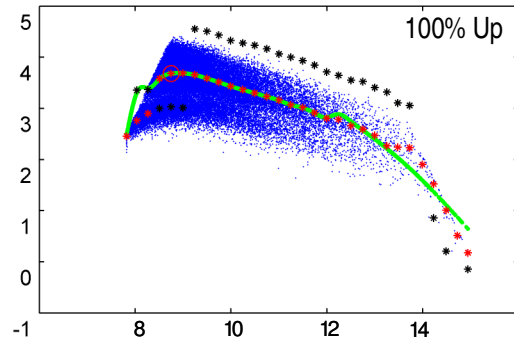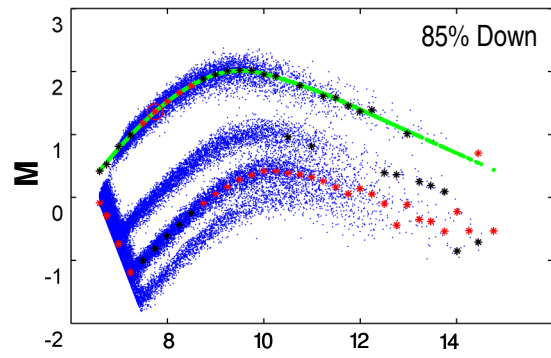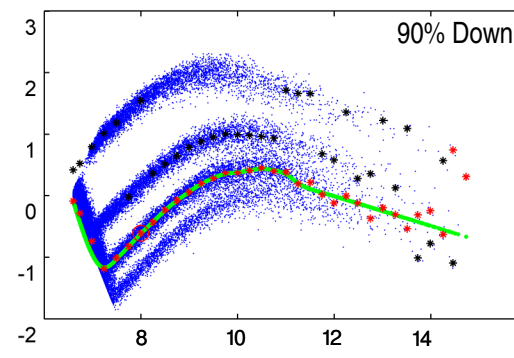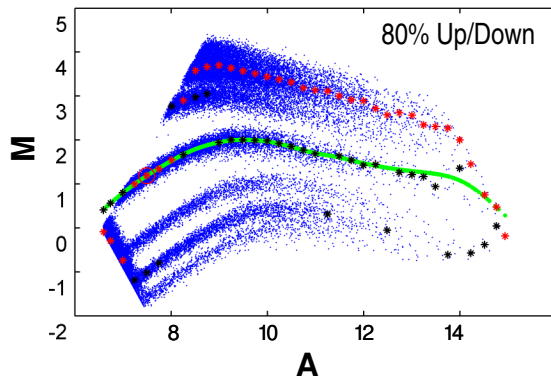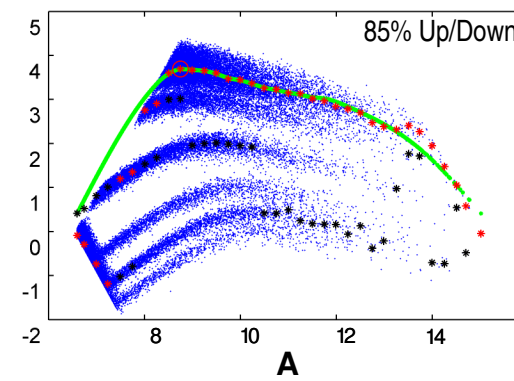

Supplement: 1471-2105-9-505-S1.pdf [file 1471-2105-9-505-S1.pdf]
